# Supplementary material for: Chitosan-DNA nanoparticles: synthesis and optimization for long-term storage and effective delivery
Source: PeerJ journal article supplement (doi:10.7717/peerj.18750), 2025-01-24
Supplement: Supplemental_Raw_Data_1.zip [file Supplemental_Raw_Data_1.zip]

## Sheet: 24 hours 1 to 1
#	Z-Average size (d.nm)	PDI	PDI width (d.nm)	Zeta potential (mV)
1	254.7	0.106	109.4	11.149
2	250.4	0.081	98.74	10.787
3	248.1	0.109	113	10.816
4	251.7	0.112	116.5	10.801
5	227	0.216	168.9	11.656
Average	246.38	0.1248	121.308	11.0418
SD	11.0931	0.0524471	27.4238	0.375042

## Sheet: 24 hours 2 to 1
#	Z-Average size (d.nm)	PDI	PDI width (d.nm)	Zeta potential (mV)
1	324.5	0.35	231.4	19.426
2	322.2	0.289	149.8	19.132
3	241.7	0.304	161.7	20.73
4	325.5	0.049	144.6	18.75
5	296.3	0.155	197.8	19.178
Average	302.04	0.2294	177.06	19.4432
SD	35.8298	0.124239	36.7956	0.758922

## Sheet: 24 hours 3 to 1
#	Z-Average size (d.nm)	PDI	PDI width (d.nm)	Zeta potential (mV)
1	373.2	0.327	274	31.242
2	380.1	0.341	273	30.967
3	363.5	0.373	276	30.564
4	316.1	0.377	280	30.486
5	358.8	0.389	202.6	30.583
Average	358.34	0.3614	261.12	30.7684
SD	25.0268	0.0261687	32.8233	0.323899

## Sheet: 24 hours 4 to 1
#	Z-Average size (d.nm)	PDI	PDI width (d.nm)	Zeta potential (mV)
1	378.9	0.278	185.4	34.584
2	397.6	0.358	198.4	33.958
3	367.8	0.345	196.9	34.23
4	410.1	0.352	194.1	33.857
5	425.6	0.387	187.7	34.354
Average	396	0.344	192.5	34.1966
SD	23.2657	0.0402057	5.70482	0.295054

## Sheet: 48 hours 1 to 1
#	Z-Average size (d.nm)	PDI	PDI width (d.nm)	Zeta potential (mV)
1	271.6	0.22	127.3	11.348
2	279.5	0.221	131.3	11.563
3	267.4	0.109	127.2	10.816
4	268.7	0.232	129.5	10.801
5	265.9	0.228	127.1	11.656
Average	270.62	0.202	128.48	11.2368
SD	5.3886	0.0522255	1.86601	0.406662

## Sheet: 48 hours 2 to 1
#	Z-Average size (d.nm)	PDI	PDI width (d.nm)	Zeta potential (mV)
1	299.6	0.256	132.5	19.334
2	303.4	0.187	149.8	18.545
3	305.2	0.203	156.4	20.342
4	308.8	0.126	153.6	18.574
5	309.1	0.139	197.8	18.584
Average	305.22	0.1822	158.02	19.0758
SD	3.96131	0.0522657	24.1011	0.781881

## Sheet: 48 hours 3 to 1
#	Z-Average size (d.nm)	PDI	PDI width (d.nm)	Zeta potential (mV)
1	331.1	0.228	195.9	30.896
2	366.1	0.375	237.5	31.455
3	363.5	0.373	276	31.867
4	362.5	0.29	190.7	30.953
5	379.7	0.287	198.6	31.358
Average	360.58	0.3106	219.74	31.3058
SD	17.8699	0.0629389	36.5348	0.397597

## Sheet: 48 hours 4 to 1
#	Z-Average size (d.nm)	PDI	PDI width (d.nm)	Zeta potential (mV)
1	435.5	0.187	188.1	34.454
2	392.4	0.32	178.56	34.232
3	409.8	0.259	205.6	34.256
4	392.7	0.357	193.6	33.675
5	404.9	0.237	170.4	33.348
Average	407.06	0.272	187.252	33.993
SD	17.6219	0.0673573	13.5758	0.462591

## Sheet: 72 hours 1 to 1
#	Z-Average size (d.nm)	PDI	PDI width (d.nm)	Zeta potential (mV)
1	269.9	0.125	114.2	10.76
2	283.7	0.076	78.39	11.483
3	288	0.225	128.5	11.44
4	275.4	0.098	76.92	11.436
5	275.8	0.091	129.5	10.608
Average	278.56	0.123	105.502	11.1454
SD	7.21339	0.0597202	26.1365	0.425013

## Sheet: 72 hours 2 to 1
#	Z-Average size (d.nm)	PDI	PDI width (d.nm)	Zeta potential (mV)
1	302.6	0.216	213.2	19.834
2	309.2	0.188	204.3	18.956
3	310.5	0.231	154.4	19.798
4	317.8	0.267	178.6	20.23
5	305.5	0.243	154.9	20.134
Average	309.12	0.229	181.08	19.7904
SD	5.76342	0.029555	27.2682	0.502367

[truncated: 2 more sheets: 72 hours 3 to 1, 72 hours 4 to 1]
